# Supplementary material for: Supporting vulnerable families’ meal practices: process evaluation of a nationwide intervention implemented by a retailer and social organizations
Source: PubMed Central journal article supplement — BMC Public Health. 2024 Nov 6;24:3060. doi: 10.1186/s12889-024-20488-8 (PMC11539700; doi:10.1186/s12889-024-20488-8), 2024-11-06

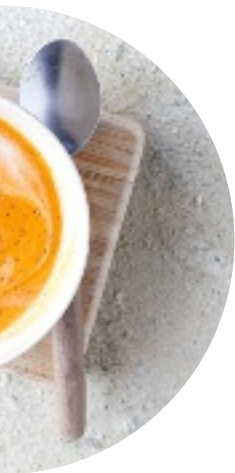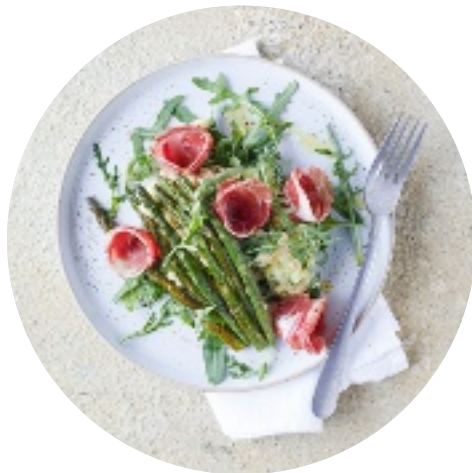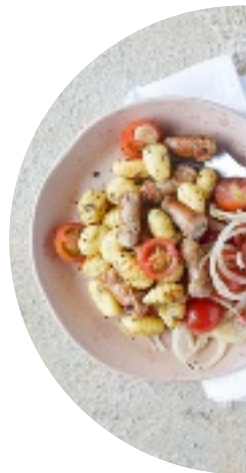

# Aan tafel in **1** - **2** - **3** euro

6 gemakkelijke recepten voor elke dag

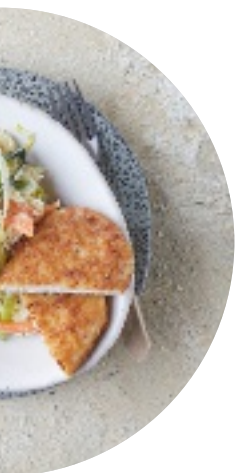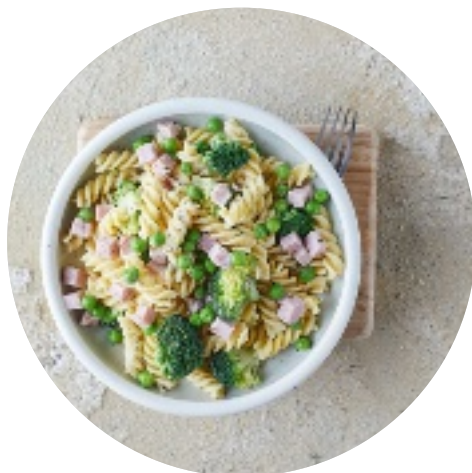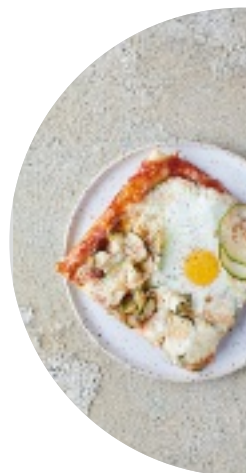

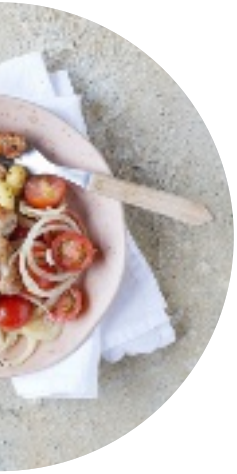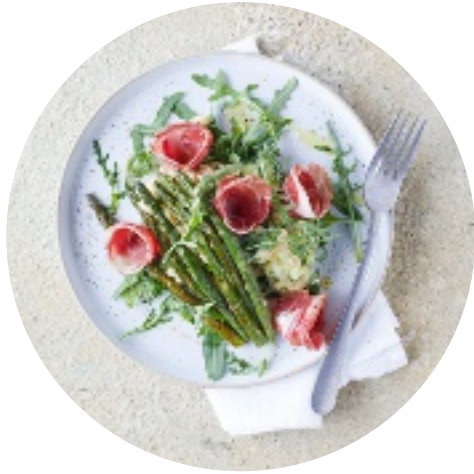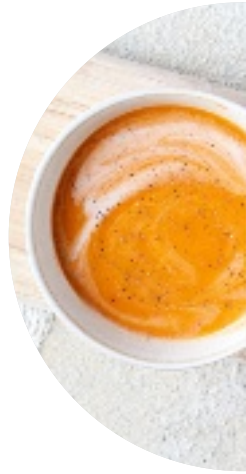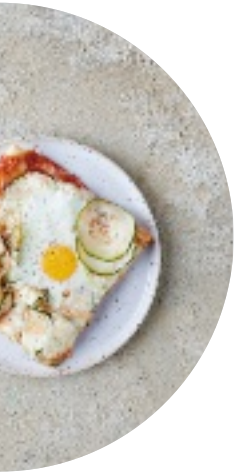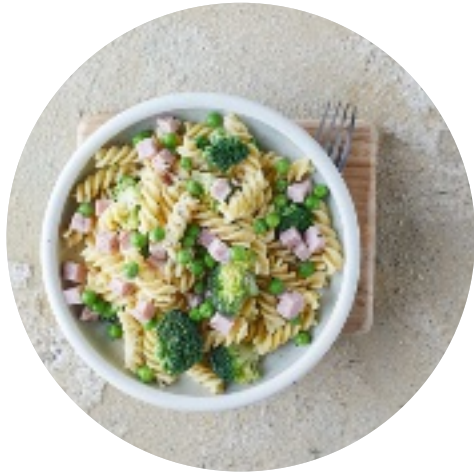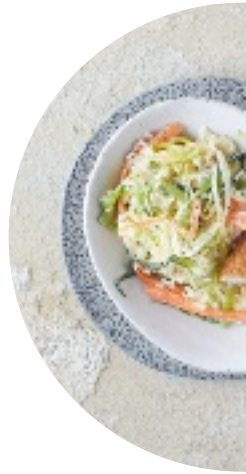

# Aan tafel in 1 - 2 - 3 euro

## 6 gemakkelijke recepten

In dit receptenboekje vind je 6 smakelijke gerechten vol variatie. Ze zijn ook heel lekker voor kinderen. Laat hen meehelpen in de keuken. Bij de tips voor kinderen staat dit symbool:

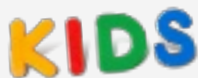

## Voor 3 personen

Elk recept is goed voor **3 grote porties**, bv. 1 volwassene en 2 grote kinderen. Heb je kleine kinderen, dan zal je eten over hebben. Af en toe geven we tips om restjes de volgende dag op te gebruiken.

## Aangepaste voeding

We duiden ook aan welke recepten lactosevrij, glutenvrij, vegetarisch of vegan zijn met de volgende symbolen:

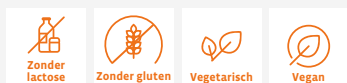

Gebruik je andere ingrediënten dan in het boodschappenlijstje? Bekijk dan goed de verpakking om te zien of de symbolen nog kloppen.

## Maximum 3 euro per portie

De recepten kosten 1, 2 of 3 euro per portie. Aan de kassa betaal je maximum 3, 6 of 9 euro. Bij elk recept staat de prijs.

## Wat zit er in die prijs?

- De **volledige verpakking** van elk product. Heb je bijvoorbeeld 300 g pasta nodig, dan koop je een verpakking van 500 g. In de prijs zit de volledige verpakking. Zo weet je wat je zal betalen aan de kassa.
- De volgende **basisproducten** zitten niet in de prijs: olijfolie, azijn, suiker, boter, bloem, tijm, cayennepeper, peper en zout.

### Met praktisch boodschappenlijstje

Achteraan vind je per recept een lijst met **producten die je nodig hebt**. Neem het mee naar de winkel, zo kan je snel alles vinden.

Hoofdgerecht

Boordeval groenten

# Stoemp van witte bonen met asperges en coppa

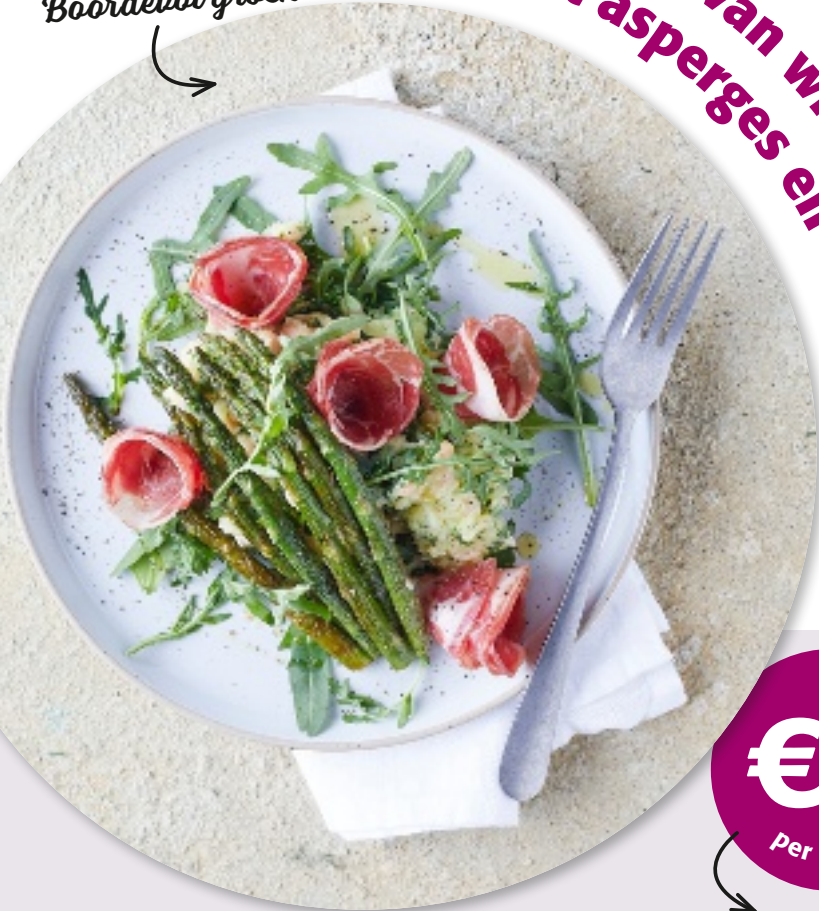

€3

Per portie

max. € 9 aan de kassa  
voor 3 porties

 3 personen

 35 min.

## Uit je keuken

- 4 eetlepels olijfolie
- peper en zout

## Ingrediënten

- 100 g coppa (charcuterie)
- 200 g groene-aspergepunten
- 100 g rucola
- 500 g aardappelen
- 400 g witte bonen (blik)

## Materiaal

- kookpot
- pan

## Vooraf (10 min.)

- Spoel de witte bonen onder koud water en laat uitlekken.
- Snij de uiteindes van de aspergepunten.
- Schil de aardappelen en snij in stukken.
- Snij de helft van de rucola in grote stukken.

## Bereiding (25 min.)

- 1 Kook de aardappelen 20 min. in water met een beetje zout. Giet af.
- 2 Doe de witte bonen en de gesneden rucola bij de aardappelen. Voeg 2 eetlepels olijfolie, peper en zout toe. Plet tot een puree.
- 3 Verhit intussen 2 eetlepels olijfolie in een pan en bak de aspergepunten 5 à 10 min. op een zacht vuur. Kruid met peper en zout.

## Afwerking

Serveer de stoemp met de aspergepunten en de rest van de rucola. Leg er wat coppa op.

## KIDS

Zo kunnen ze helpen:

- de witte bonen spoelen onder water en laten uitlekken
- de aardappelen schillen met een dunschiller en in stukken snijden
- de helft van de rucola in stukken snijden

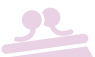

## Stoemp: ideaal om restjes op te gebruiken

Stoemp is een typisch Belgische groentepuree die je in elk seizoen kan eten. Je kan er ook heel makkelijk restjes in verwerken. Dus heb je nog een beetje groenten in de koelkast of de diepvries? Maak er dan een stoemp van.

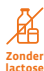

Zonder lactose

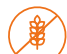

Zonder gluten

Voedingswaarde per persoon (op basis van de ingrediëntenlijst): **Energie** 445 kcal – **Vetten** 22,1 g (waarvan verzadigde vetzuren 4,8 g – **Koolhydraten** 38,3 g (waarvan suikers 3,4 g – **Vezels** 9,3 g – **Eiwitten** 18,8 g – **Zout** 1,8 g

Hoofdgerecht

*Lekker voor het hele gezin*

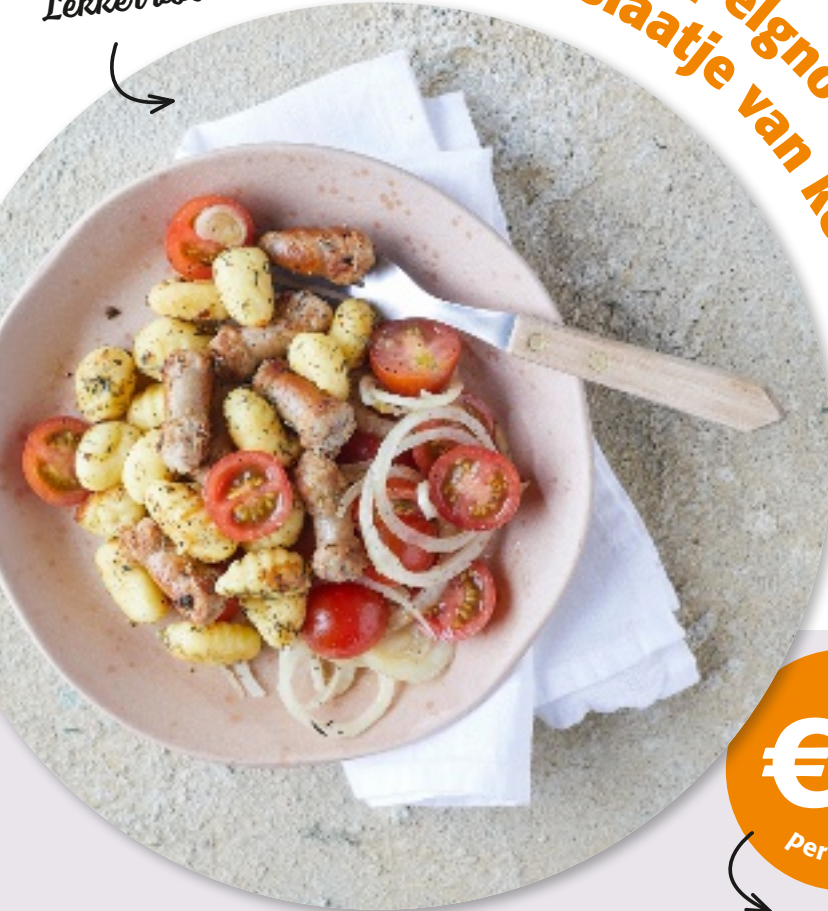

# Aardappelgnocchi met chipolata en slaatje van kerstomaten

€2

Per portie

*max. € 6 aan de kassa  
voor 3 porties*

 3 personen

 25 min.

## Uit je keuken

- 3 eetlepels olijfolie
- 1 koffielepel tijm (gedroogd)
- peper en zout

## Ingrediënten

- 3 chipolata's (beenhouwerij)
- 500 g kerstomaten
- 1 ui
- 500 g aardappelgnocchi (versmarkt)

## Materiaal

- kookpot
- pan

## Vooraf (10 min.)

- Snij de kerstomaten in 2.
- Snij de ui in dunne schijfjes.
- Snij de chipolata's in stukken van 2 à 3 cm.

## Bereiding (15 min.)

- 1** Kook de aardappelgnocchi gaar in water met een beetje zout (kooktijd: zie verpakking). Giet af.
- 2** Verhit 1 eetlepel olijfolie in een pan en bak de chipolata's 5 min. aan alle kanten goudbruin. Voeg de aardappelgnocchi toe en bak nog 1 à 2 min. Kruid met de tijm, peper en zout.
- 3** Meng de ui intussen onder de kerstomaten en voeg 2 eetlepels olijfolie, peper en zout toe.

## KIDS

Zo kunnen ze helpen:

- de kerstomaten in 2 snijden
- de chipolata's in stukken snijden
- de ui, de olijfolie, peper en zout onder de kerstomaten mengen

Snel klaar

# Tomatenroomsoep

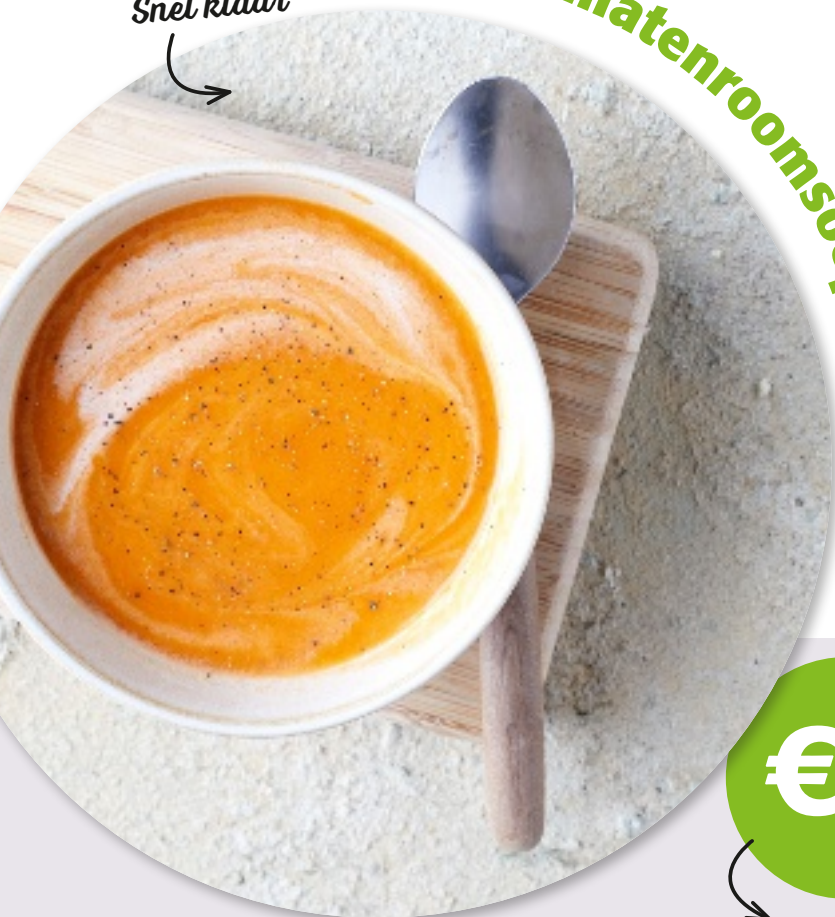

€1

max. € 3 aan de kassa  
voor 3 porties

 3 personen

 20 min.

## Uit je keuken

- 2 eetlepels olijfolie
- peper en zout

## Ingrediënten

- 2 uien
- 2 teentjes verse knoflook
- 10 cl room
- 400 g tomatenstukjes (blik)
- 1 blokje groentebouillon

## Materiaal

- kookpot
- staafmixer



## Vooraf (5 min.)

Snipper het knoflook en de uien fijn.

## Bereiding (15 min.)

- 1 Verhit de olijfolie in een kookpot en bak het knoflook en de uien 2 min.
- 2 Voeg de tomatenstukjes en 1 L heet water toe. Breek het bouillonblokje in stukjes boven de kookpot. Breng aan de kook en laat 10 min. op een matig vuur sudderen. Mix de soep glad.
- 3 Klop intussen de room op tot ze wat dikker wordt. Kruid met peper en zout.

## Afwerking

Werk elk kommetje soep af met een lepel room.

## KIDS

Zo kunnen ze helpen:

de room opkloppen tot ze dikker wordt en kruiden met peper en zout

## Hoe uien snijden zonder huilen?

Met water kan je tranen vermijden. Maak je mesje bijvoorbeeld regelmatig nat of snij de ui naast een lopende kraan. Je kan de ui ook een tiental minuutjes in de koelkast of de diepvriezer leggen, want koude zorgt er ook voor dat het gas in de ui zich minder verspreidt in de lucht.

Hoofdgerecht

*Vandaag eten we vis*

# Kabeljauwburger en rijst met groenten

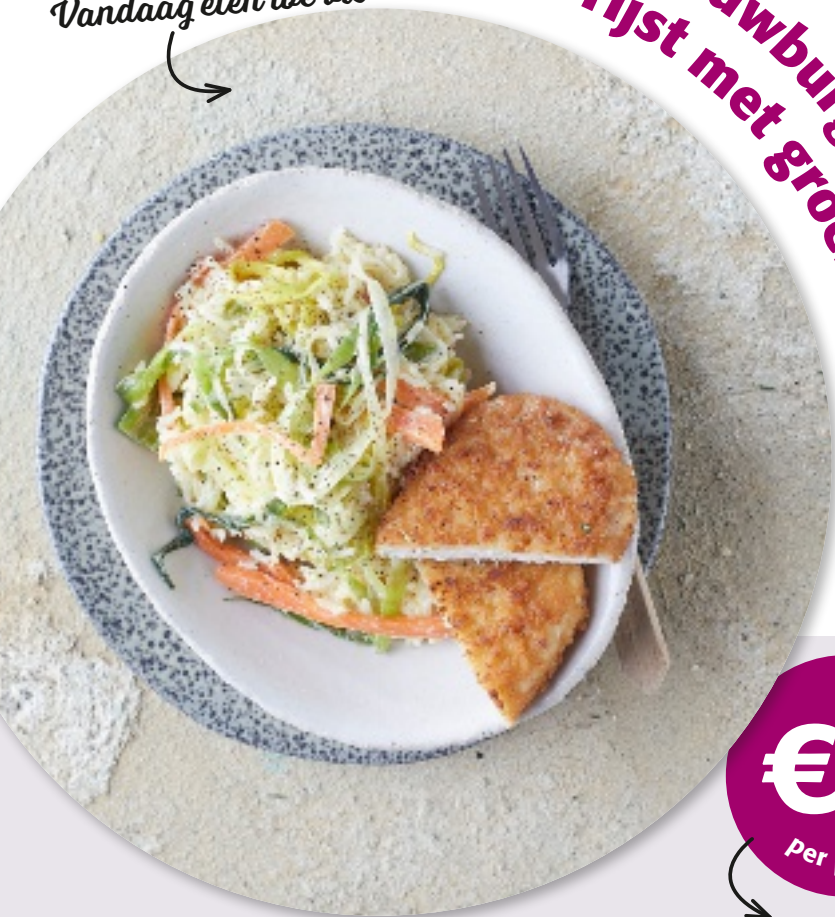

€3

Per portie

*max. € 9 aan de kassa  
voor 3 porties*

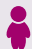

3 personen

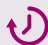

30 min.

## Uit je keuken

- 4 eetlepels olijfolie
- peper en zout

## Ingrediënten

- 3 kabeljauwburgers (versmarkt)
- 3 preien
- 250 g wortelen
- 20 cl zure room
- 125 g basmatirijst
- 1 blokje groentebouillon

## Materiaal

- 2 kookpotten
- pan

## Vooraf (10 min.)

- Snij de preien in de lengte in 2 en daarna in dunne reepjes.
- Schil de wortelen en snij in dunne reepjes.

## Bereiding (20 min.)

- 1 Kook de rijst gaar in water met een beetje zout (kooktijd: zie verpakking). Giet af.
- 2 Verhit intussen 2 eetlepels olijfolie in een kookpot en kook de groenten ± 10 min. Breek het bouillonblokje in stukjes boven de kookpot.
- 3 Verhit 2 eetlepels olijfolie in een pan en bak de kabeljauwburgers ± 5 min. aan elke kant goudbruin.
- 4 Meng de groenten en de zure room onder de rijst.

## KIDS

Zo kunnen ze helpen:

- de preien in de lengte in 2 snijden en daarna in fijne reepjes
- de wortelen schillen en in dunne reepjes snijden
- de groenten en de zure room onder de rijst mengen

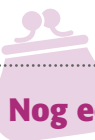

## Nog een burger over?

Verhit 1 eetlepel olijfolie in een pan en bak de burger gaar. Snij in hapklare stukjes en serveer als aperitiefhapje samen met wat tartaarsaus. Je kan de burger ook tussen een broodje leggen samen met wat rauwkost. Zo heb je snel een lekkere lunch.

Weinig werk

# Pasta met kruidenkaas, ham en groene groenten

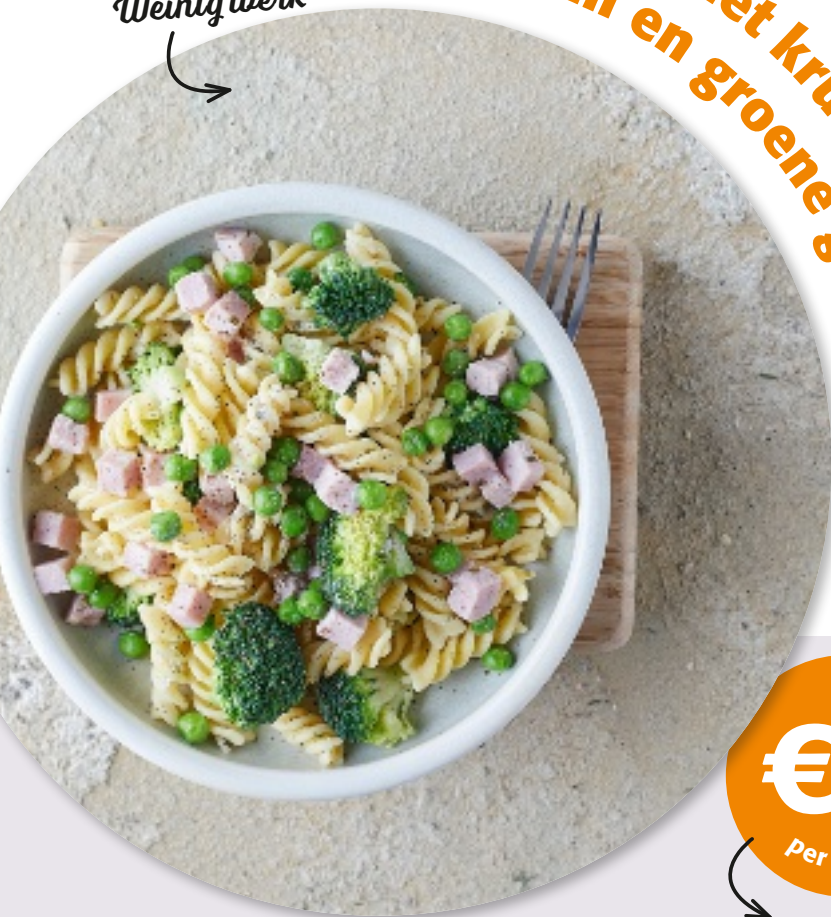

€2

Per portie

max. € 6 aan de kassa  
voor 3 porties

 3 personen

 20 min.

## Uit je keuken

- 2 eetlepels olijfolie
- peper en zout

## Ingrediënten

- 250 g gekookte hamblokjes (versmarkt)
- 200 g erwten (diepvries)
- 1 broccoli
- 150 g verse roomkaas met look en fijne kruiden
- 300 g spirelli

## Materiaal

kookpot

### Vooraf (5 min.)

Snij de broccoli in kleine roosjes.

### Bereiding (15 min.)

- 1 Kook de spirelli samen met de broccoli gaar in water met een beetje zout (kooktijd: zie verpakking). Dek de kookpot niet af. Voeg de diepgevroren erwten de laatste 2 min. toe. Giet af.
- 2 Meng de roomkaas en de hamblokjes onder de pasta en de groenten. Voeg de olijfolie, peper en zout toe.

## KIDS

Zo kunnen ze helpen:

- de broccoli in kleine roosjes snijden
- de kruidenkaas en de hamblokjes onder de pasta en de groenten mengen

### Hoe broccoli snijden?

- 1 Snij de roosjes los van de steel.

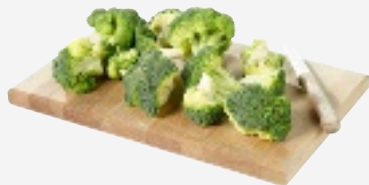

- 2 Snij in kleinere stukjes en snij de kleine takjes van de roosjes.

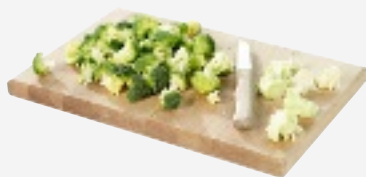

- 3 De steel van de broccoli kan je ook eten. Je moet hem wel eerst schillen.

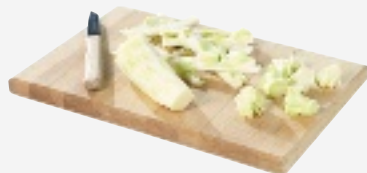

- 4 Snij de geschilde steel en de kleine takjes uit stap 2 in stukjes.

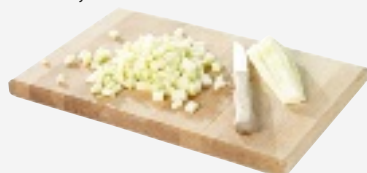

# Pizza met ei en courgette

Veggie op het menu

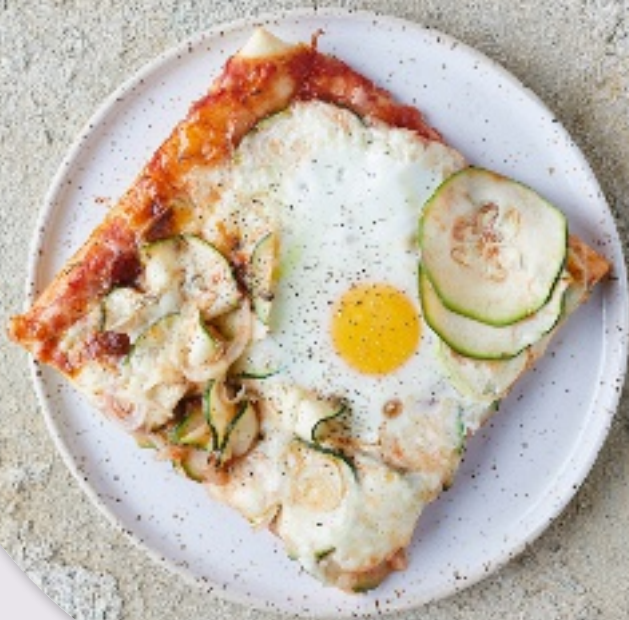

€3

Per portie

max. € 9 aan de kassa

voor 3 porties

 3 personen

 20 min. + ± 20 min. in de oven

## Uit je keuken

- 4 eetlepels olijfolie
- 1 koffielepel tijm (gedroogd)
- peper en zout

## Ingrediënten

- 2 courgettes
- 1/2 plantje basilicum
- 1 ui
- 3 eieren
- 100 g geraspte mozzarella
- 550 g pizzadeeg (versmarkt)
- 500 g passata (gezeefde tomaten)

## Materiaal

- kookpot
- pan
- oven
- bakplaat

## Vooraf (10 min.)

- Snij de ongeschilde courgettes in dunne schijfjes.
- Snij de ui in dunne schijfjes.
- Kruid de passata met de tijm, peper en zout.
- Verwarm de oven voor op 200 °C.

## Bereiding (10 min. + ± 20 min. in de oven)

- 1 Rol het pizzadeeg op het bakpapier uit op een bakplaat.
- 2 Besmeer het pizzadeeg met de passata tot op 1 cm van de rand. Verdeel er de courgette, de ui en de geraspte mozzarella over.
- 3 Breek de eieren een voor een in een kommetje en verdeel ze over de pizza. Zorg ervoor dat elk ei op een ander stukje van de pizza ligt, zodat je de pizza kan verdelen in 3 stukjes met een ei.
- 4 Zet ± 20 min. in de voorverwarmde oven.

## Afwerking

Haal de pizza uit de oven en werk af met blaadjes basilicum.

## KIDS

Zo kunnen ze helpen:

- de ongeschilde courgettes in dunne schijfjes snijden
- de passata kruiden met tijm, peper en zout
- het pizzadeeg uitrollen op de bakplaat
- de pizza beleggen met passata, courgette, ui en mozzarella

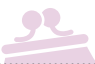

## Nog mozzarella en eieren over?

Maak roerei met mozzarella: klop de eieren los en kruid met peper en zout. Doe ze in een pan met antiaanbaklaag en bak al roerend op een matig vuur. Zet het vuur zachter als de eieren steviger beginnen te worden. Voeg dan de mozzarella toe. Roer tot de kaas gesmolten is en alles romiger wordt. Je kan er ook wat reepjes spek of pancetta aan toevoegen.

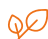

Vegetarisch

Voedingswaarde per persoon (op basis van de ingrediëntenlijst): **Energie** 903 kcal – **Vetten** 33,9 g (waarvan verzadigde vetzuren 9,9 g – **Koolhydraten** 110,2 g (waarvan suikers 25,4 g – **Vezels** 7,4 g – **Eiwitten** 36,0 g – **Zout** 4,6 g

# Boodschappenlijstje

Op de volgende pagina's vind je per recept een lijst met producten die je nodig hebt. Je kan dit lijstje afscheuren en meenemen naar de winkel.

## Wat zetten we in het boodschappenlijstje?

De **hoeveelheid van de volledige verpakking**. Als je 300 g pasta nodig hebt, koop je een verpakking van 500 g. We schrijven dan de verpakking van 500 g op de boodschappenlijst.

### Uit je keuken

Olijfolie, azijn, suiker, boter, bloem, tijm, cayennepeper, peper en zout staan niet in het boodschappenlijstje. Die gebruikt u **uit uw eigen keuken**. Hebt u ze niet in huis, dan vindt u ze gemakkelijk terug in de winkel met het lijstje hieronder.

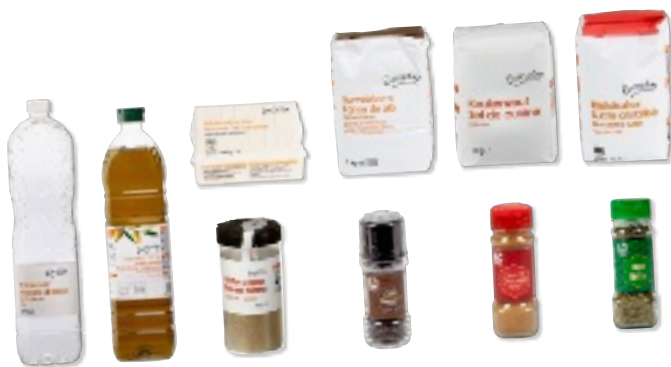

- 1,5 L natuuraazijn
- 1 L olijfolie
- 250 g ongezouten melkerijboter
- 1 kg tarwebloem
- 1 kg keukenzout
- 1 kg kristalsuiker
- 100 g witte peper
- 35 g zwarte peper (molen)
- 40 g cayennepeper
- 20 g tijm (gedroogd)



# Stoemp van witte bonen met asperges en coppa

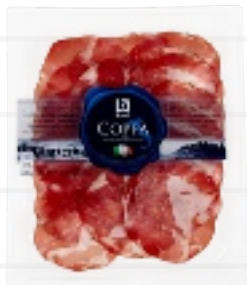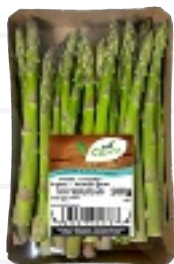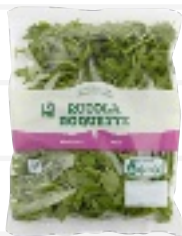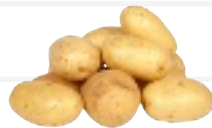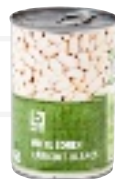

- 100 g coppa (charcuterie)
- 200 g groene-aspergepunten
- 100 g rucola
- 500 g aardappelen
- 400 g witte bonen (blik)

Prijzen geldig van 1/6 t.e.m. 14/6/2022.

**€3**  
Per portie

max. € 9 aan de kassa  
voor 3 porties

# Aardappelgnocchi met chipolata en slaatje van kerstomaten

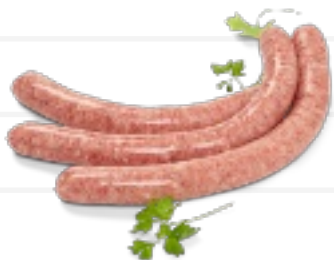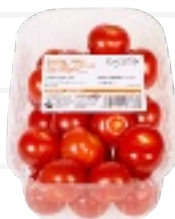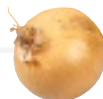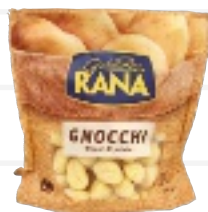

- 3 chipolata's (varken, beenhouwerij)
- 500 g kerstomaten
- 1 ui
- 500 g Gnocchi di Patate Giovanni Rana (versmarkt)

Prijzen geldig van 1/6 t.e.m. 14/6/2022.

**€2**  
Per portie

max. € 6 aan de kassa  
voor 3 porties

# Tomatenroomsoep

Recept p 8-9

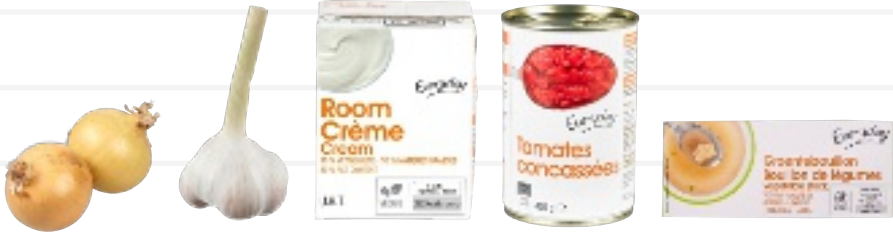

- 2 uien
- 1 bol verse knoflook ..... 2 teentjes nodig
- 20 cl room 30 % vetgehalte ..... 10 cl nodig
- 400 g tomatenstukjes (blik)
- 12 blokjes groentebouillon ..... 1 nodig

Prijzen geldig van 1/6 t.e.m. 14/6/2022.

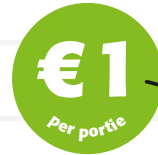

max. € 3 aan de kassa  
voor 3 porties

# Kabeljauwburger en rijst met groenten

Recept p 10-11

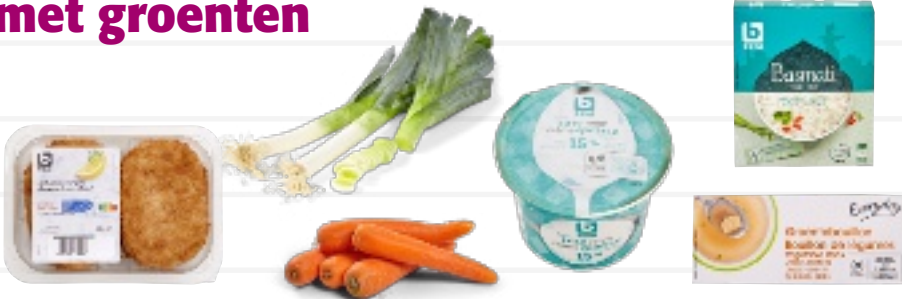

- 4 kabeljauwburgers (versmarkt) ..... 3 nodig
- 3 preien
- 250 g wortelen
- 20 cl zure room 15 % vetgehalte
- 500 g basmatirijst in kookbultjes ..... 125 g nodig
- 12 blokjes groentebouillon ..... 1 nodig

Prijzen geldig van 1/6 t.e.m. 14/6/2022.

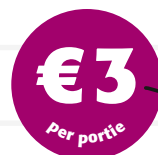

max. € 9 aan de kassa  
voor 3 porties

# Pasta met kruidenkaas, ham en groene groenten

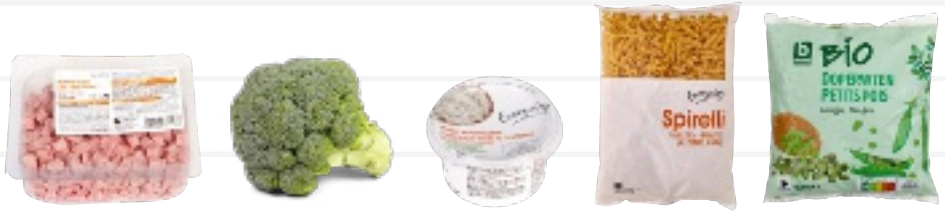

- 250 g gekookte hamblokjes (versmarkt)
- 1 broccoli
- 150 g verse roomkaas met look en fijne kruiden
- 500 g spirelli ..... 300 g nodig
- 600 g doperwtjes (diepvries) ..... 200 g nodig

Prijzen geldig van 1/6 t.e.m. 14/6/2022.

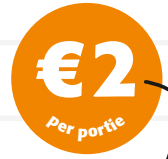

max. € 6 aan de kassa  
voor 3 porties

# Pizza met ei en courgette

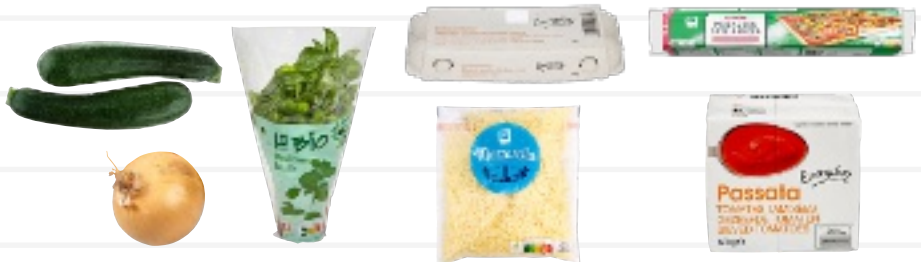

- 2 courgettes
- 1 ui
- 1 plantje basilicum ..... 1/2 nodig
- 12 scharreleieren ..... 3 nodig
- 250 g geraspte mozzarella ..... 100 g nodig
- 550 g pizzadeeg (versmarkt)
- 500 g passata (gezeefde tomaten, brik)

Prijzen geldig van 1/6 t.e.m. 14/6/2022.

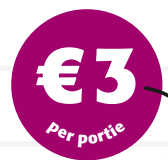

max. € 9 aan de kassa  
voor 3 porties

# Aan tafel in 1 - 2 - 3 euro

Dit boekje komt elke 2 weken uit. Er staan **6 gemakkelijke en alledaagse recepten** in, voor 1, 2 of 3 euro per portie.

De gerechten zitten vol variatie en zijn ook lekker voor kinderen.

Achteraan vind je een handig **boodschappenlijstje** dat je kan meenemen naar de winkel.

Ga aan tafel in 1-2-3 euro met deze 6 smakelijke gerechten:

## Recepten voor € 1

Tomatenroomsoep

p. 8-9

## Recepten voor € 2

Aardappelgnocchi met chipolata  
en slaatje van kerstomaten

p. 6-7

Pasta met kruidenkaas, ham en groene groenten

p. 12-13

## Recepten voor € 3

Stoemp van witte bonen met asperges en coppa

p. 4-5

Kabeljauwburger en rijst met groenten

p. 10-11

Pizza met ei en courgette

p. 14-15

## Kookvragen of suggesties?

### Contacteer ons:

- 02 345 2345
- [info@colruyt.be](mailto:info@colruyt.be)
- [facebook.com/ColruytLekkerKoken.EnCuisine](https://facebook.com/ColruytLekkerKoken.EnCuisine)

Sommige artikelen zijn niet in alle Colruyt-winkels beschikbaar.

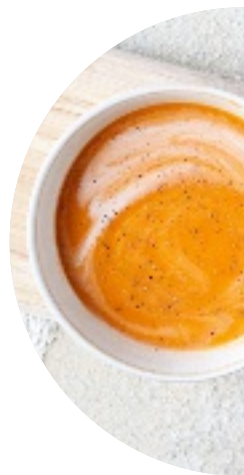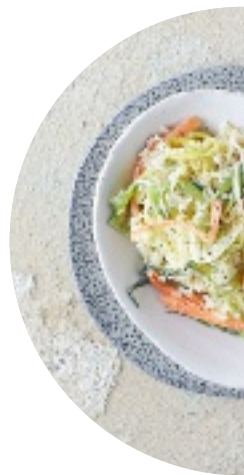

Supplement: 12889_2024_20488_MOESM1_ESM.pdf [file 12889_2024_20488_MOESM1_ESM.pdf]
